# Supplementary material for: An mTERF domain protein functions in group II intron splicing in maize chloroplasts
Source: PubMed Central journal article supplement (PMC4005652; doi:10.1093/nar/gku112), 2014-02-05

## Supplementary Table S1

**Supplementary Table S1:** List and sequences of oligonucleotides used for qRT-PCR.

| Chloroplastic Genes                      | Forward Primer:        | Sequence (5'>3'):               | Reverse Primer:        | Sequence (5'>3'):              |
|------------------------------------------|------------------------|---------------------------------|------------------------|--------------------------------|
| <i>rps12-int1 spliced</i>                | spliced rps12-int1_F1  | GGAACATGTGCTAGGGTGATACTA        | spliced rps12-int1_R1  | AATGCGATATCTCACACCGGGT         |
| <i>rps12-int1 unspliced</i>              | rps12-int1_F2          | TGGATTTCACCAAAGGAAACCA          | rps12-int1_R2          | GCCGCGTTAAGGGATGTCC            |
| <i>yef3-int2 spliced</i>                 | spliced yef3-int2_F1   | GAATGGCCTGTCTCCTCGGTAA          | spliced yef3-int2_R3   | GCGACTAGAAATTGATCCCTATGAT      |
| <i>yef3-int2 unspliced</i>               | yef3-int2_F2           | TCCTGGAGTAAGCGCTATAGCTTGT       | yef3-int2-R2           | AGCAATTTCTGAGCCGTATGAGGT       |
| <i>petD spliced</i>                      | spliced petD_F1        | AAGCGGATATTGGGAGTAACA           | spliced petD_R1        | CACCAATCATTGACGGCTCT           |
| <i>petD unspliced</i>                    | petD_F2                | TGTCGGGTTCTTTGGGGATGG           | petD_R2                | AAAGATCGTTGGGCCACGCGG          |
| <i>atpF spliced</i>                      | spliced atpF_F1        | GATTTTTTTGGAAAGGAGTGTAAA        | spliced atpF_R1        | TACTCATCTGCTTCCAGTTCGAC        |
| <i>atpF unspliced</i>                    | atpF_F2                | AGCGGGAGAGCAAATGAATCGA          | atpF_R2                | AGGGTCCCTTACGCAATCTTCCG        |
| <i>ndhA-spliced</i>                      | spliced ndhA_F3        | CCTGCTACTAATCTTCTCTGCTT         | spliced ndhA_R3        | GTGTACTAGCAATATCTACTATC        |
| <i>ndhA-unspliced</i>                    | ndhA_F2                | AGGCTGACGCCAAAGATCCATCC         | ndhA_R2                | AGAGGAGCCGTATGAAGCTAAGGTT      |
| <i>rpl2 spliced</i>                      | spliced rpl2_F1        | GGGAAATGCCCTACCTTTGACCG         | spliced rpl2_R1        | CCAAACGGACCTCCCAGATGGT         |
| <i>rpl2 unspliced</i>                    | rpl2_F2                | TCAATGGGAAATGCCCTACCTTTG        | rpl2_R2                | TGAACTCAATCACTTGTGCCGT         |
| <i>petB spliced</i>                      | E250petBf-2            | GTTTTGGTATCTCTGGAATATGAGTAAAGTA | E249 petBr             | TATACTCGAGCTAACGACCCGAAATACCTT |
| <i>petB unspliced</i>                    | petB_F4                | ACCGTGGCTGATGGAGTTTGAACC        | petB_R4                | CTGCAATGCCTGAATCTCAAGACG       |
| <i>ndhB spliced</i>                      | E248 ndhB_F            | CTCCTGACGCTACGAAGGATCCC         | E248 ndhB_R            | GCCCTATGGACGAATATGCAAGCAT      |
| <i>ndhB unspliced</i>                    | ndhB_F3                | AGCAACGACTGGAGTGGGGGA           | ndhB_R3                | TCACTTAGGAGCCGTGCGAGA          |
| <i>rps12-int2 unspliced</i>              | rps12-int2_F1          | TGGTAGCCTGCTCCAGTCCCC           | rps12-int2_R1          | CGAGGAACCCATAGATGCTGTCCG       |
| <i>rps12-int2 spliced</i>                | spliced rps12-int2F    | GCCAGAGTACGATTAACCTCTGGAT       | spliced rps12-int2R    | CATATTTAGAACCCCTTGTGACGAT      |
| <i>yef3-int1 unspliced</i>               | yef3-int1F1            | CTCACCTTCCCAAGCGCGG             | yef3-int1R1            | TCCGACAACCTCCGGGAAA            |
| <i>yef3-int1 spliced</i>                 | spliced yef3_int1F     | GGGCATTACTATTATAGAGATGGGATG     | spliced yef3_int1R     | AGCCTTTGTATGCTCTCCATTGCTT      |
| <i>rpl16 unspliced</i>                   | rpl16F1                | TGCCTCGGCAGGATTTCCCT            | rpl16R1                | TCATTCGCGAGGAGCTGGATGA         |
| <i>rpl16 spliced</i>                     | spliced rpl16_F        | ATGCTTAGTCCCAAAGAACTAGATTCG     | spliced rpl16_R        | CGTGTCAATGCTCTTCGCTCTGC        |
| <i>rps16 unspliced</i>                   | rps16_F1               | CGAAGATCTTCTCTCTTCGAG           | rps16_R1               | TCGAGCCGTATGAGGAGAAAACCT       |
| <i>rps16 spliced</i>                     | spliced rps16_F        | CGATGTGGTAGAAAGCAACAAGCTATC     | spliced rps16_R        | AGGTTGAGCACCCCTTTCAAGGA        |
| <b>Nuclear Reference Gene</b>            | <b>Forward Primer:</b> | <b>Sequence (5'&gt;3'):</b>     | <b>Reverse Primer:</b> | <b>Sequence (5'&gt;3'):</b>    |
| <i>high mobility group GRMZM2G024976</i> | zmHMG_F1               | AAAGGGGCATCAACATCTTCA           | zmHMG_R1               | CGGAGTTGGCAAAGCAGGTTCT         |
| <i>high mobility group GRMZM2G024976</i> | zmHMG_F2               | CTAAGTCTGAAGATAAAGCTGTA         | zmHMG_R2               | AGCAGCATATCATCTTGCTC           |

**Supplementary Figure S1. Predicted structure of Zm-mTERF4.** This model was generated by I-TASSER (<http://zhanglab.ccmb.med.umich.edu/I-TASSER/>). It begins at amino acid 58 (the predicted transit peptide cleavage site) and ends at the stop codon. The arrows mark the boundaries of the mTERF repeat tract as redicted by InterPro. Each mTERF motif is colored differently to demarcate the boundaries of the repeats. The ten best templates used by I-TASSER to generate this model were PDB entries 3n6sA, 3n7qA, 3v6pA, 3ugmA, 3v6tA, 3m66A, 2z5nA, 3opgA, 2zxqA, and 1qgkA.

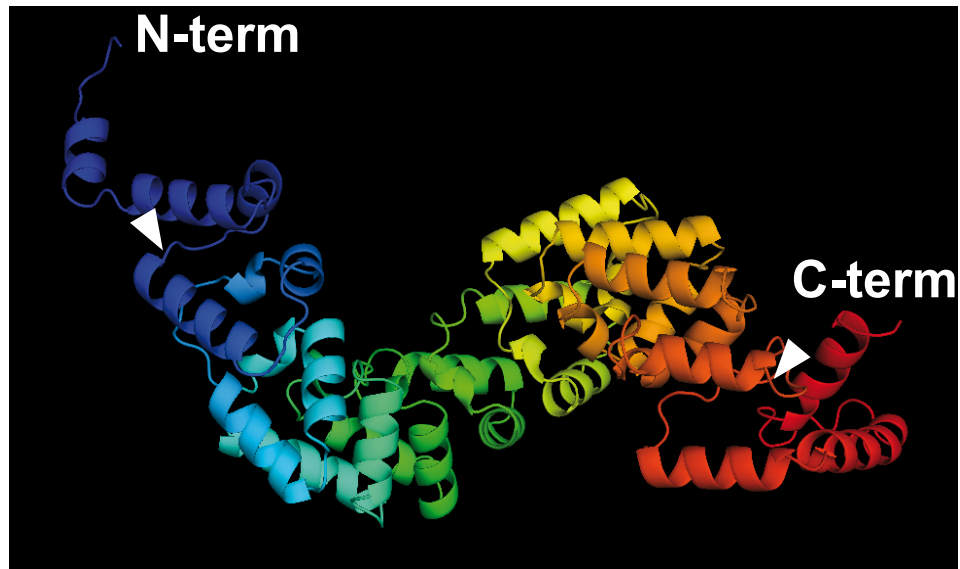

## Supplementary Figure S2. Replicate RIP-chip assay

Stromal extract was subjected to immunoprecipitation with the Zm-mTERF4 antibody. RNAs from the pellet and supernatant were differentially labeled with fluorescent dyes and hybridized to a tiling microarray of the maize chloroplast genome harboring overlapping PCR products of ~500 bp. The  $\log_2$  transformed enrichment ratio (Pellet/Supernatant) was plotted according to chromosomal position, after subtracting the  $\log_2$  ratios obtained from a control immunoprecipitation using antibody to OE16. Array elements harboring group II introns are marked.

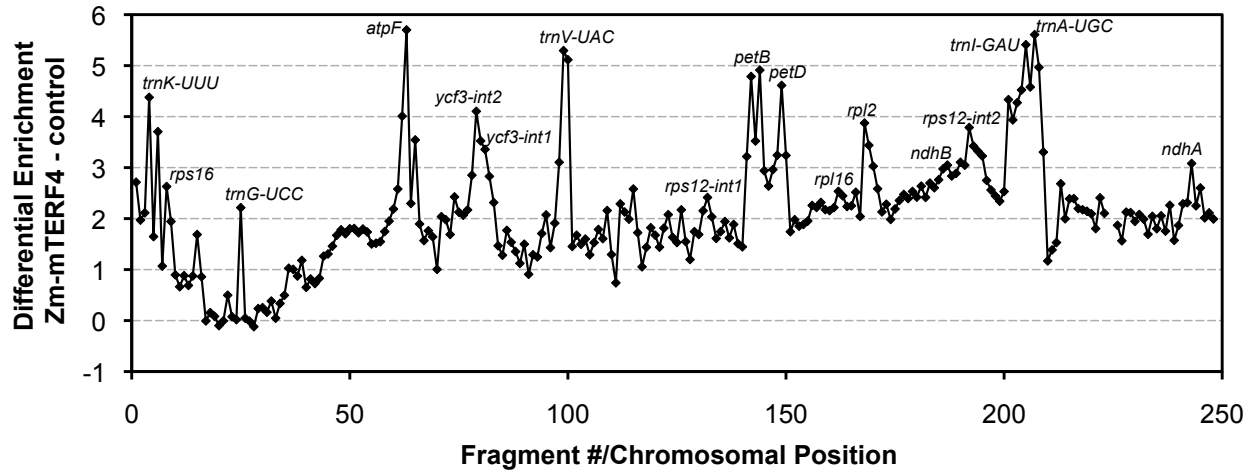

**Supplementary Figure S3. Additional analyses of chloroplast intron splicing in *Zm-mterf4* mutants by RNA gel blot hybridization.** 3  $\mu$ g of seedling leaf RNA from plants of the indicated genotype were hybridized with the indicated probes. The visible phenotype of each mutant is indicated above: pg -pale green; iv - ivory. The membranes were stained with methylene blue and excerpts harboring the rRNA bands are shown at bottom. Arrows mark bands that we believe to represent excised introns based on their hybridization to intron probes and their apparent size. *tha8* mutants are pale green and non-photosynthetic due to defects in the splicing of *ycf3*-intron 2 and *trnA* (23). Arrows mark bands that we believe to be excised introns based on their apparent size.

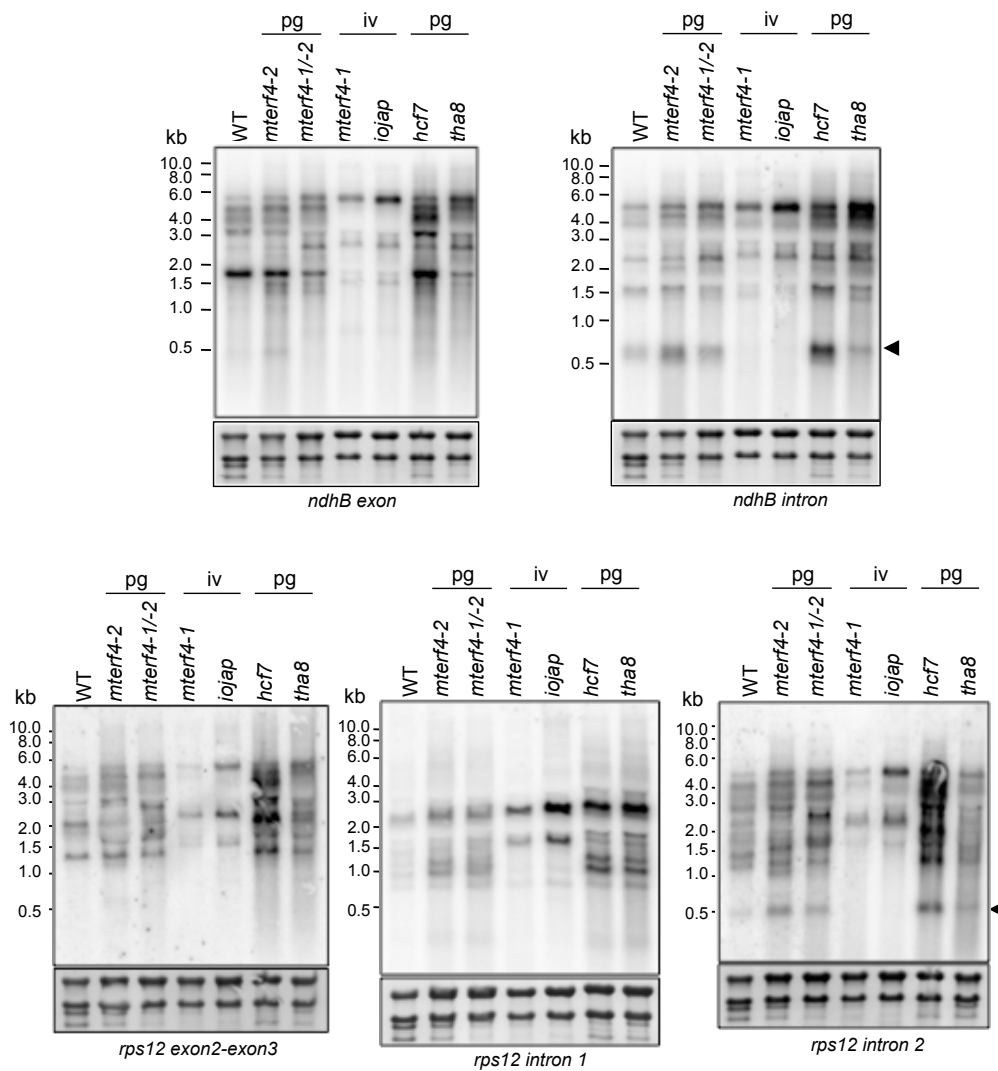

Supplementary Figure S3 continued

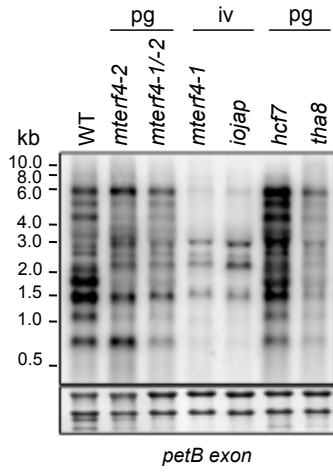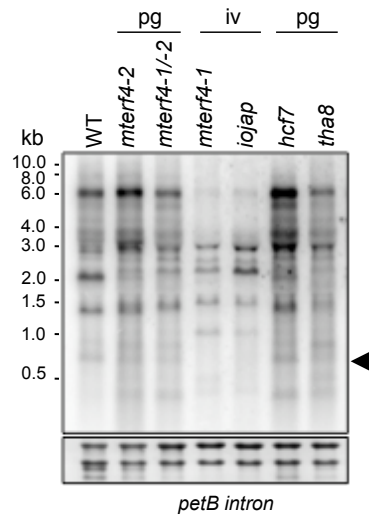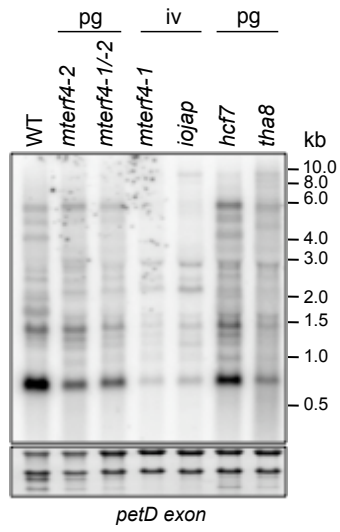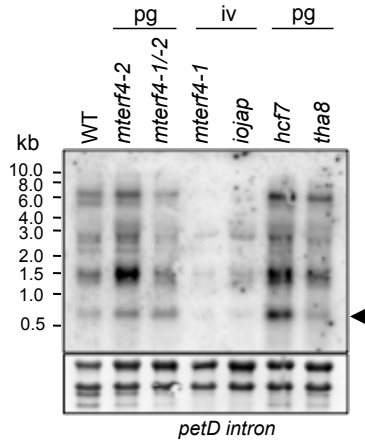

Supplementary Figure S3 continued

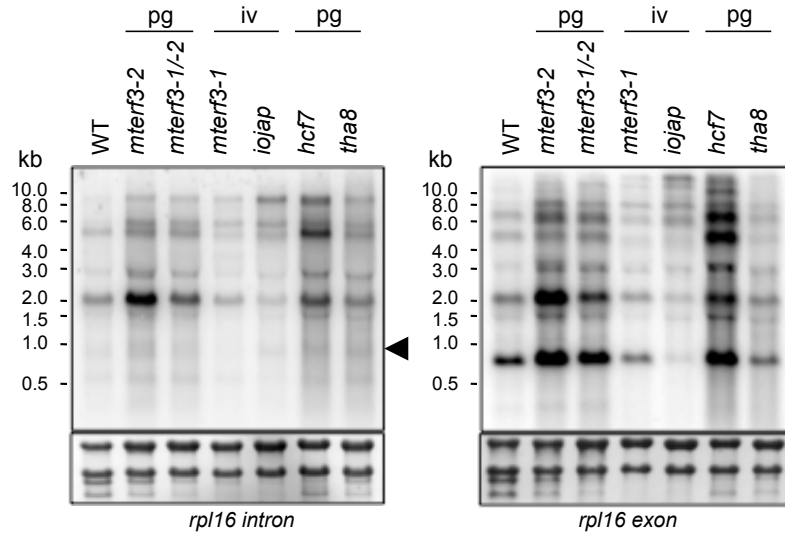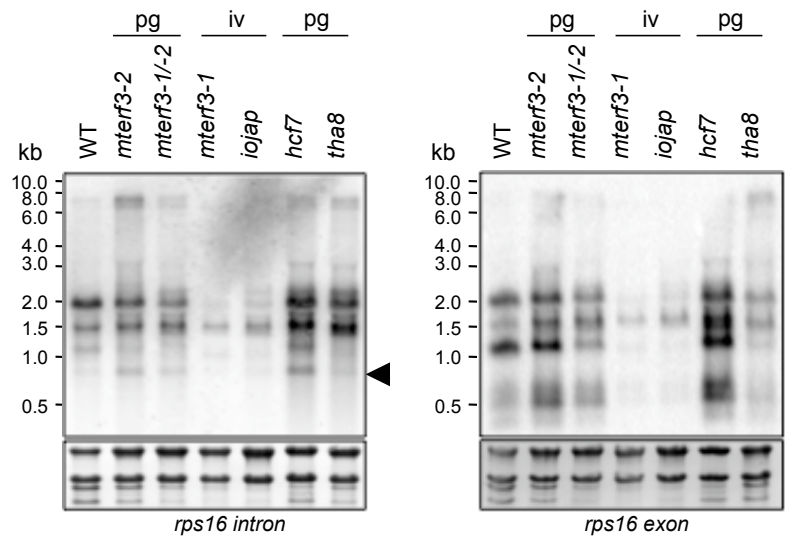

Supplementary Figure S3, continued

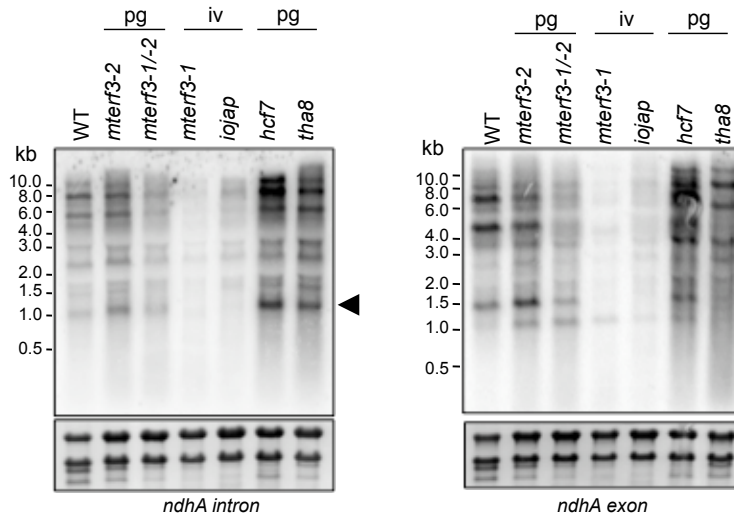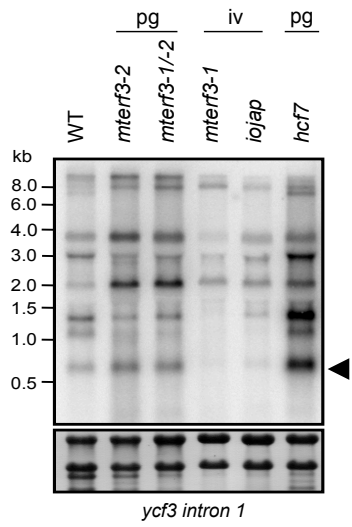

Supplement: supp_gku112_nar-01606-a-2013-File008.pdf [file supp_gku112_nar-01606-a-2013-File008.pdf]
